# Supplementary material for: The role of hypermutation and collateral sensitivity in antimicrobial resistance diversity of Pseudomonas aeruginosa populations in cystic fibrosis lung infection
Source: PubMed Central journal article supplement (PMC10865868; doi:10.1128/mbio.03109-23), 2024-01-03

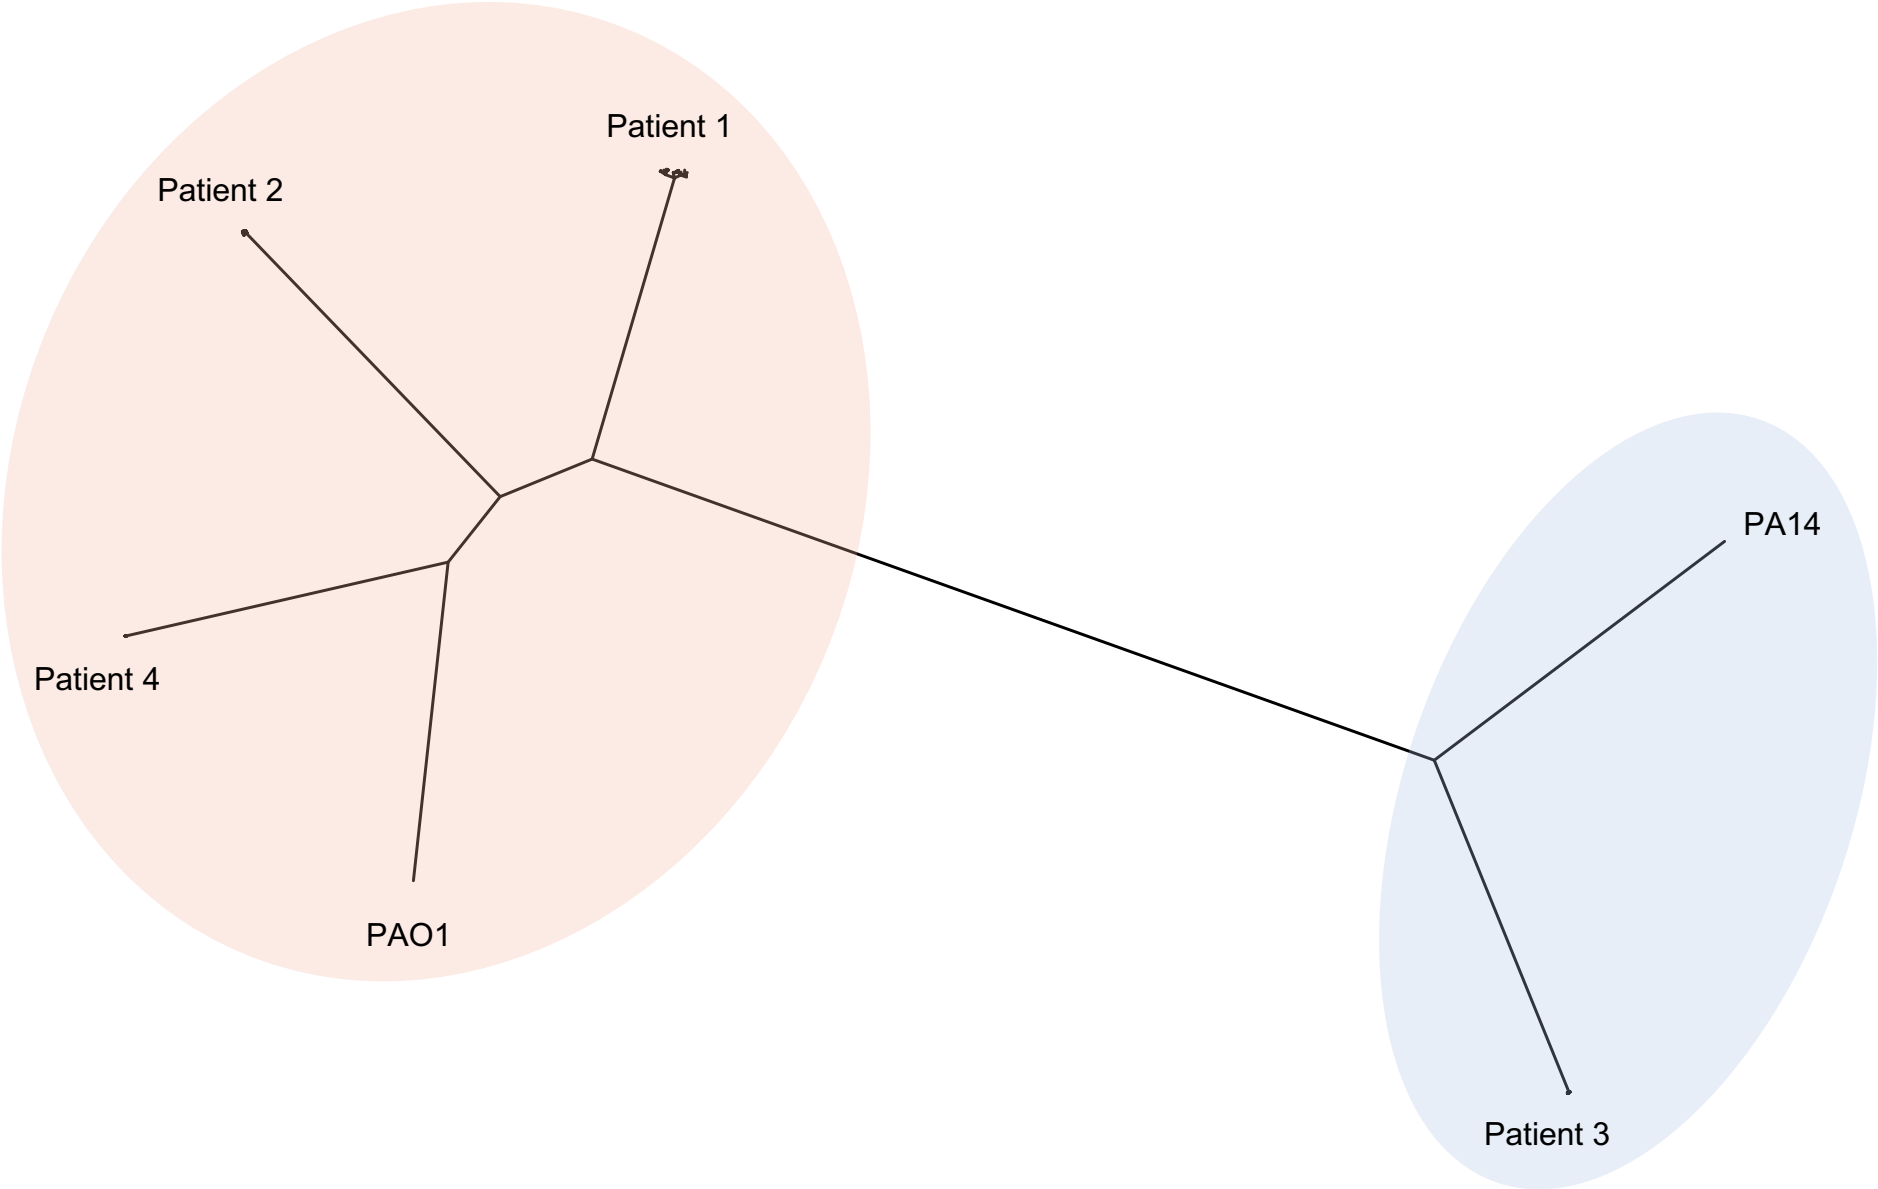

Supplement: mbio.03109-23-s0001.pdf [file mbio.03109-23-s0001.pdf]
